# Supplementary material for: The potassium channel KCNJ13 is essential for smooth muscle cytoskeletal organization during mouse tracheal tubulogenesis
Source: Springer Nature journal article supplement (doi:10.1038/s41467-018-05043-5), 2018-07-13
Supplement: MOESM1 [file 41467_2018_5043_MOESM1_ESM.pdf]

## **Supplementary Information**

The potassium channel KCNJ13 is essential for smooth muscle cytoskeletal organization during mouse tracheal tubulogenesis

Yin et al.

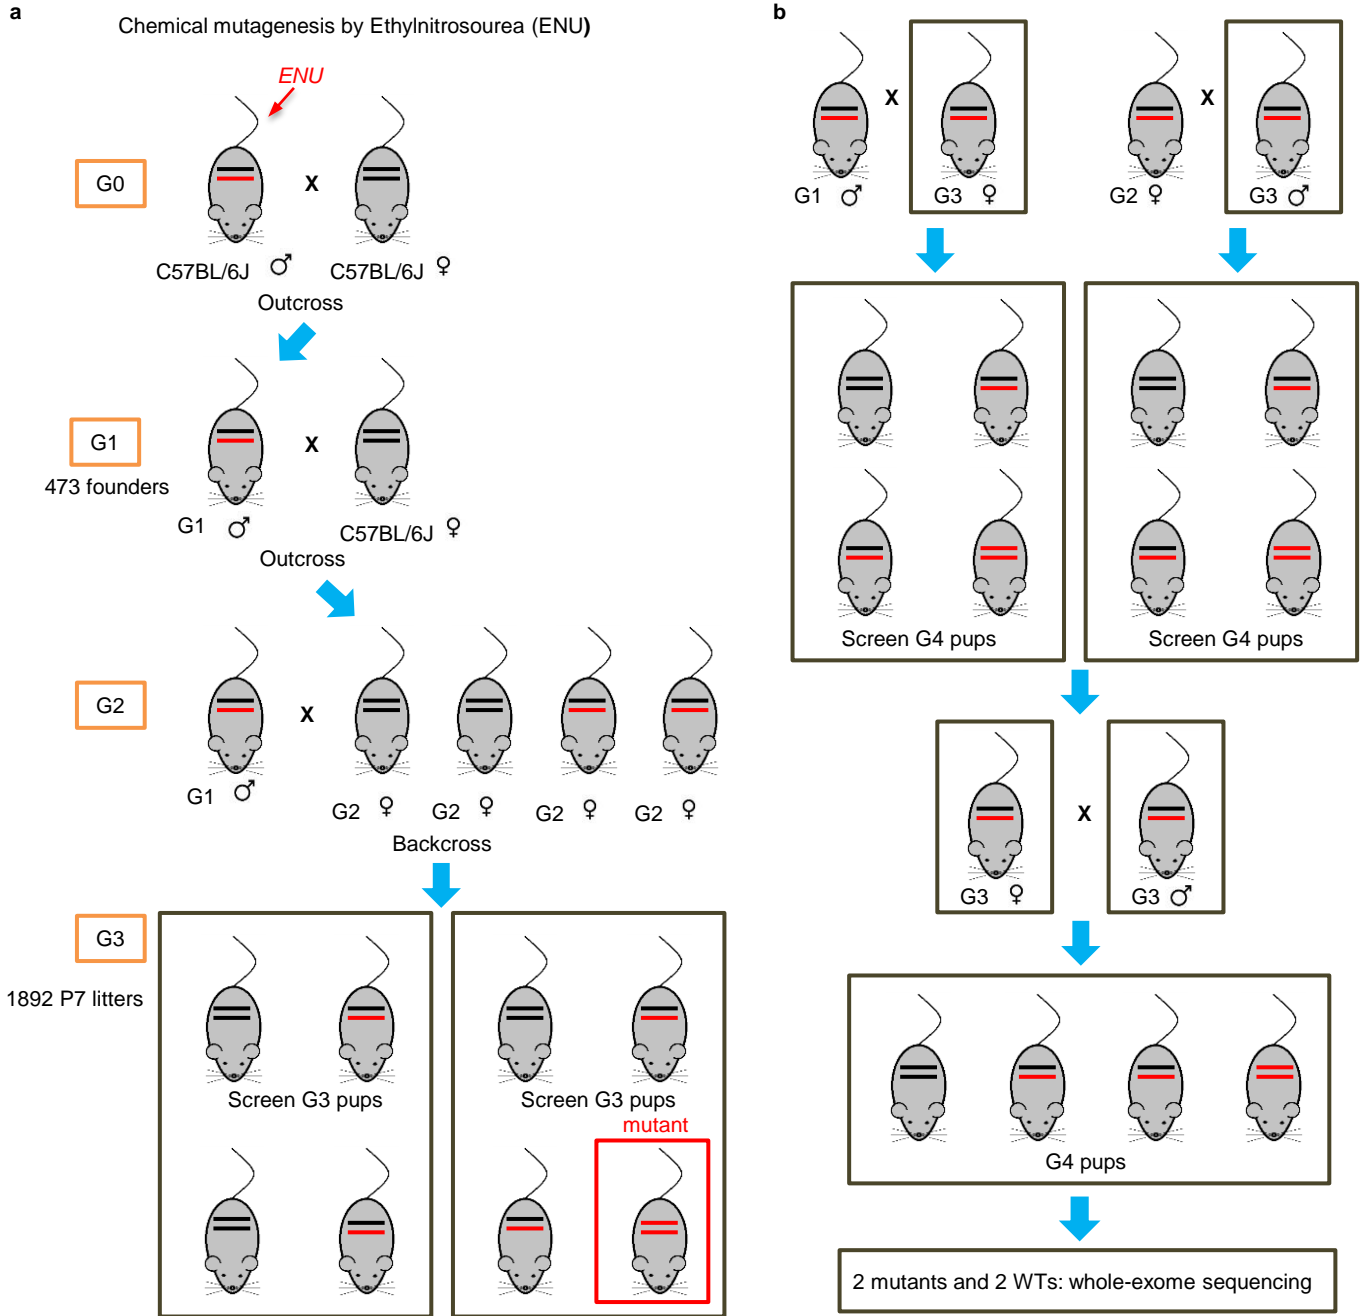

**Supplementary Figure 1. Workflow for mouse forward genetic screen and mutation recovery.** (a) Backcross breeding scheme carried out to generate G3 homozygous mutants with all progeny from one G1 male founder. (b) Pipeline for mutant recovery and mutation identification.

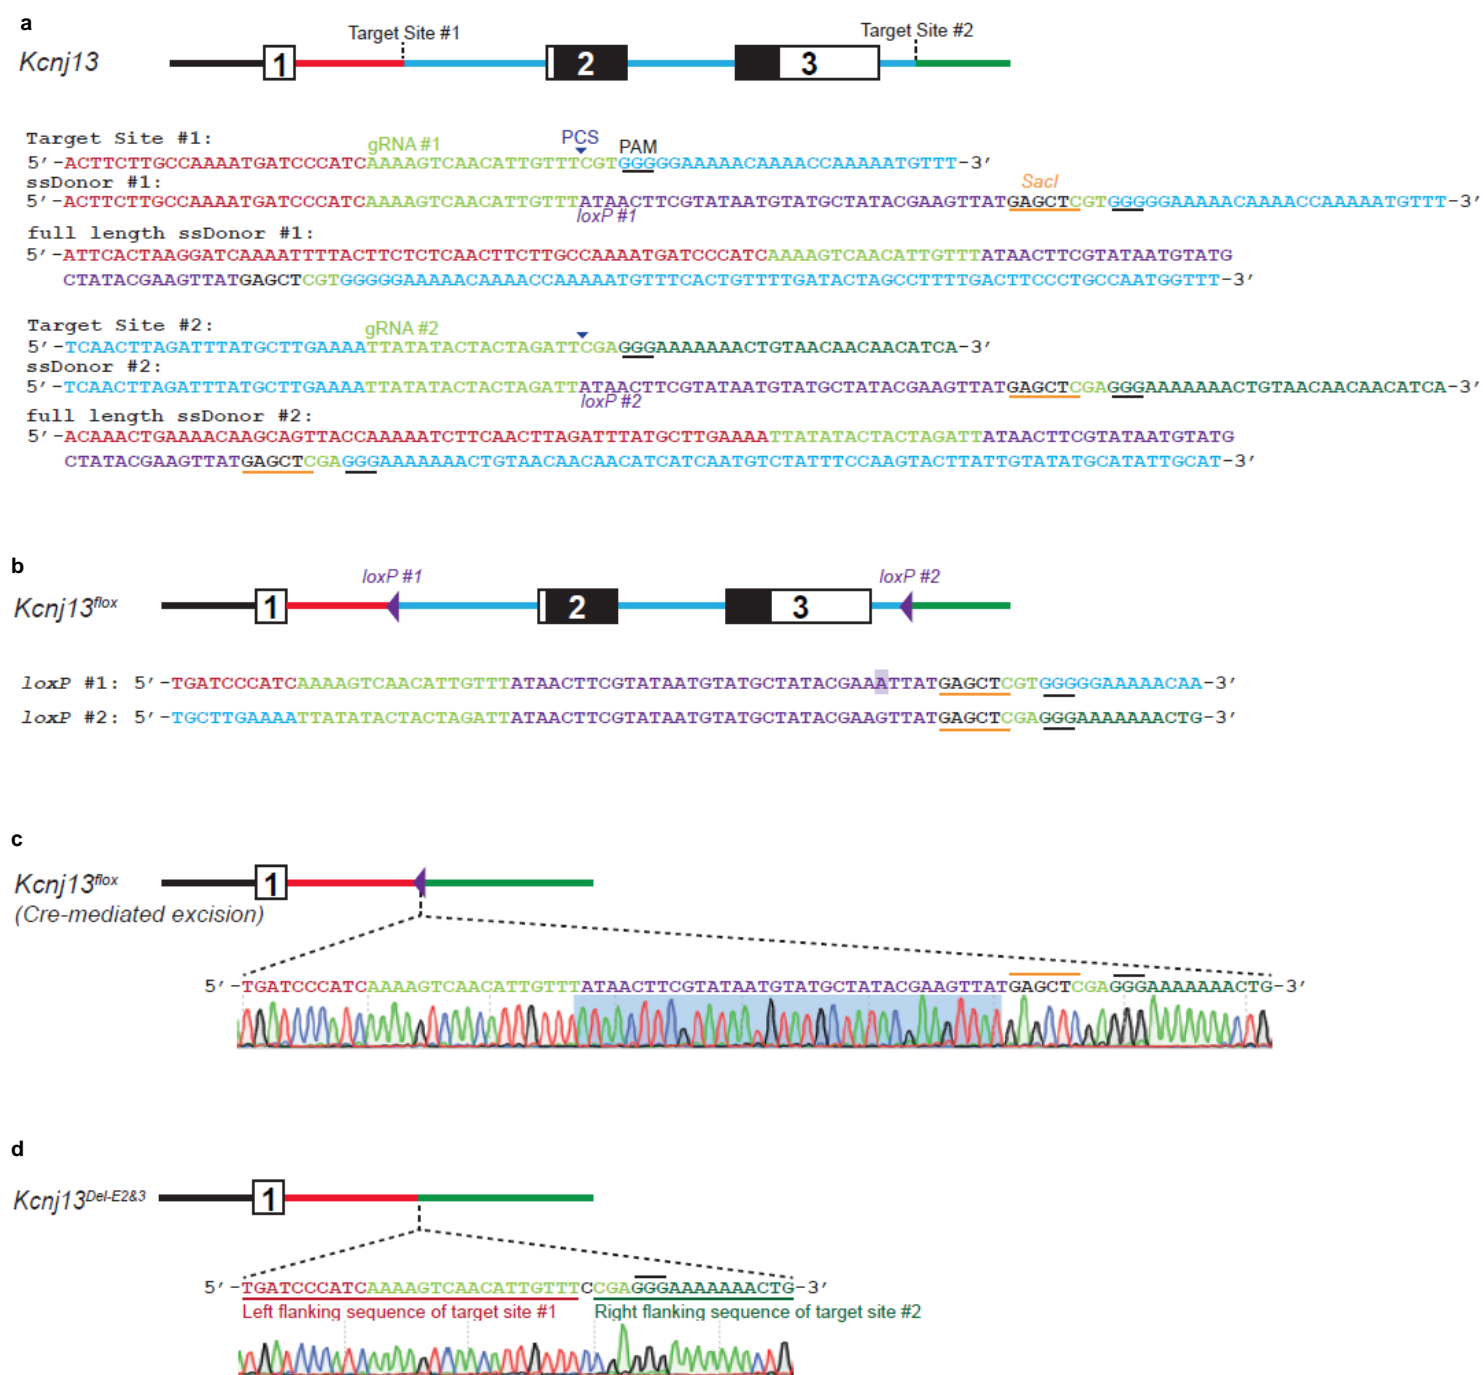

**Supplementary Figure 2. Generation of mouse *Kcnj13* floxed and deletion alleles.** (a) The CRISPR/Cas9 system was used to generate mice carrying *loxP* sites flanking exons 2 and 3 of *Kcnj13*. gRNA #1 and gRNA #2 were used to target 185 bp single stranded donor sequences (ssDonor #1 and #2) carrying *loxP* sites to intronic sites flanking exons 2 and 3. *SacI* sites were included in the ssDonor sequences to verify PCR product identity. (b) One mouse carrying two *loxP* sites in *cis* (*Kcnj13<sup>flox</sup>*) was recovered, and sequences across the two *loxP* sites following germline transmission of the allele are shown. Although *loxP* #1 has a single base pair mutation (A, shaded), it does not appear to affect Cre-mediated excision substantially. (c) Cre expression in mice carrying the floxed *Kcnj13* allele results in a 9 kb deletion with a single residual *loxP* site remaining. (d) In addition to the floxed allele, mice with a deletion of exons 2 and 3 of *Kcnj13* were also recovered. This *Kcnj13* deletion allele (*Kcnj13<sup>Del-E2&3</sup>*) contains a nearly

perfect 9 kb deletion between the two predicted cleavage sites, with the exception of a single additional base pair (a "C" shown in black between the right and left flanking sequences). DNA sequence colors correspond to specific labeled features. Putative Cleavage Site (PCS).

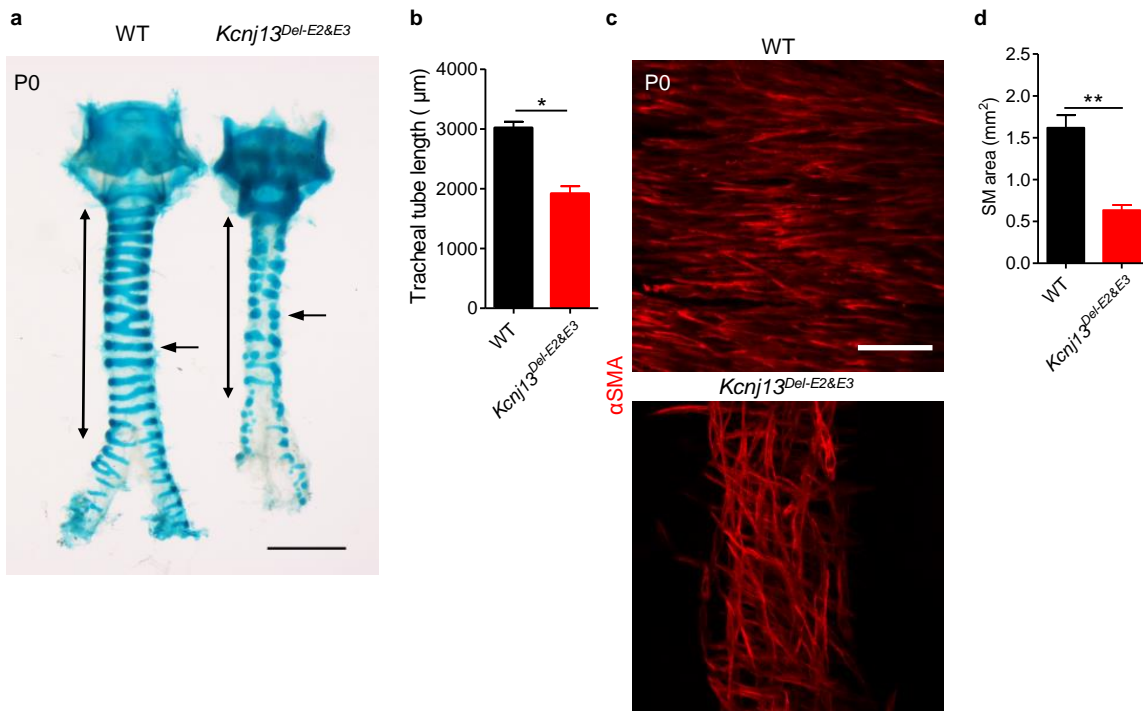

**Supplementary Figure 3. *Kcnj13<sup>Del-E2&E3</sup>* mice exhibit tracheal tube formation defects.** (a) Representative image of ventral view of wholemount tracheas stained with alcian blue from P0 WT (n=12) and *Kcnj13<sup>Del-E2&E3</sup>* mice (n=12). Double-sided arrows indicate tracheal tube length. Arrows point to tracheal cartilage rings. (b) Quantification of P0 WT (12) and *Kcnj13<sup>Del-E2&E3</sup>* (12) tracheal tube length. (c) Representative images of dorsal views of wholemount tracheas stained for αSMA (red) from P0 WT (n=8) and *Kcnj13<sup>Del-E2&E3</sup>* mice (n=8). (d) Quantification of P0 WT (n=8) and *Kcnj13<sup>Del-E2&E3</sup>* (n=8) SM area. Scale bars: 1000 μm (a), 50 μm (c). \**P* < 0.05; \*\**P* < 0.01; Unpaired Student's *t*-test, mean ± s.d.

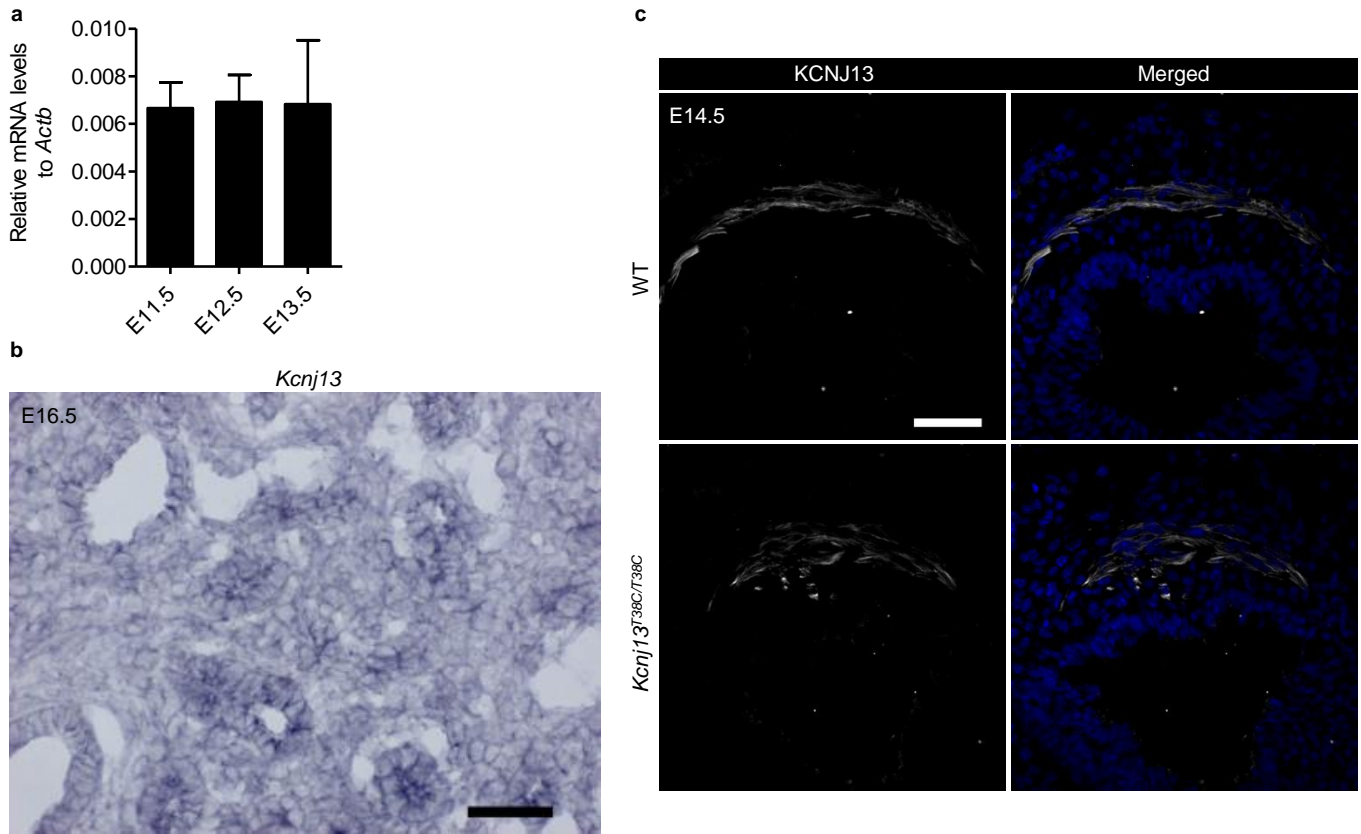

**Supplementary Figure 4. *Kcnj13* mRNA expression and KCNJ13<sup>L13P</sup> expression in tracheal SM cells.** (a) RT-qPCR analysis of *Kcnj13* expression in WT tracheas (n=5 per stage). (b) mRNA in situ hybridization for *Kcnj13* in E16.5 WT lung tissue sections (n=5). (c) Immunostaining for KCNJ13 (red) and DAPI staining (blue) of transverse sections of E14.5 WT (n=8) and *Kcnj13*<sup>T38C/T38C</sup> tracheas (n=8). Scale bars: 50  $\mu$ m.

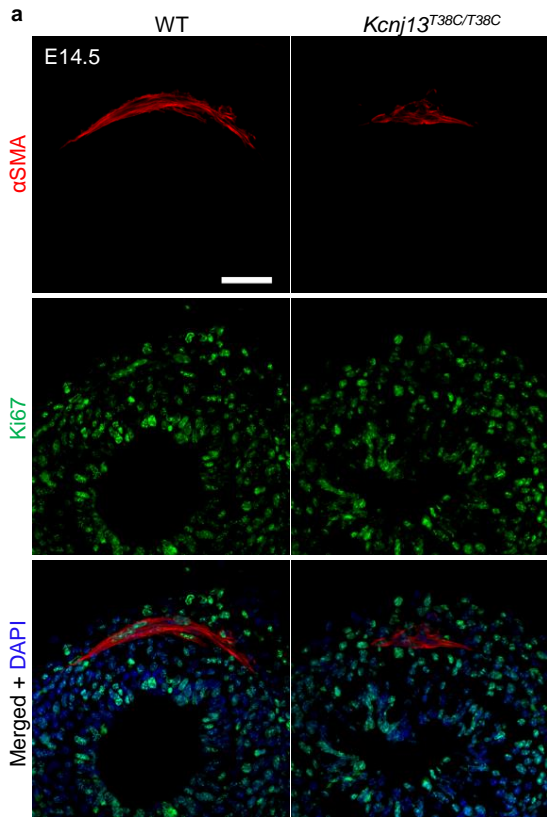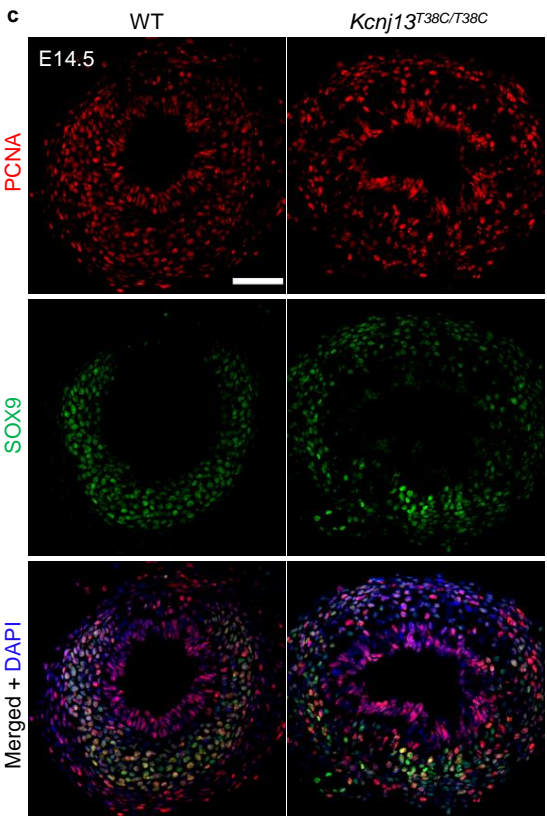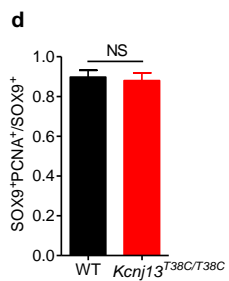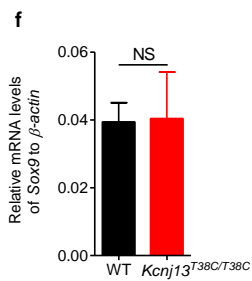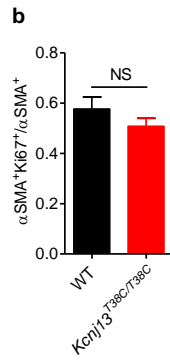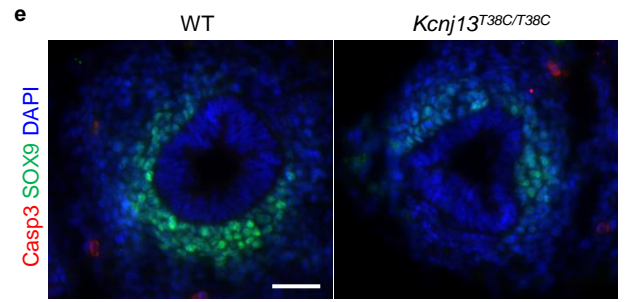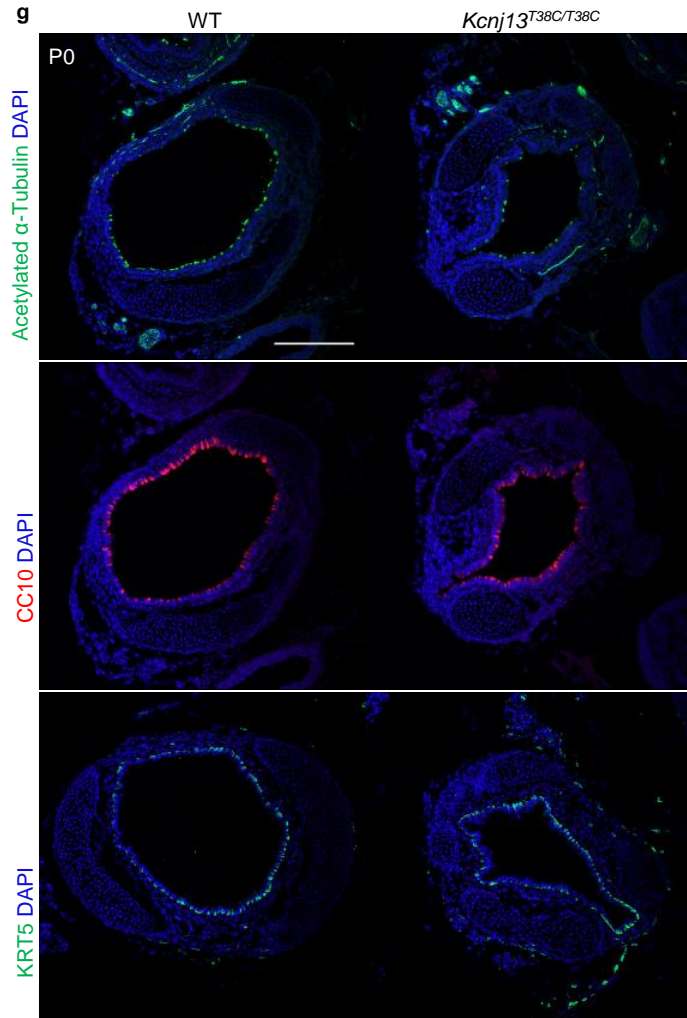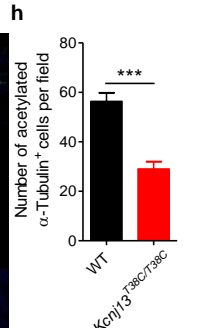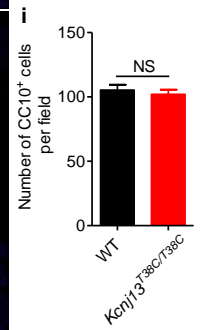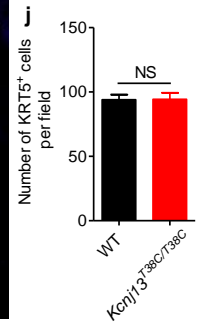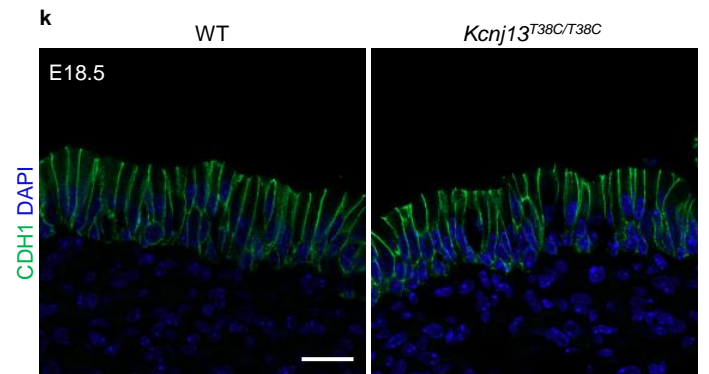

**Supplementary Figure 5. *Kcnj13*<sup>T38C/T38C</sup> mice exhibit WT-like proliferation and apoptosis rate of SM cells and SOX9<sup>+</sup> mesenchymal cells but reduced multiciliated cell differentiation. (a)**

Immunostaining for  $\alpha$ SMA (red) and Ki67 (green) and DAPI staining (blue) of transverse sections of E14.5 WT (n=7) and *Kcnj13*<sup>T38C/T38C</sup> (n=7) tracheas. (b) Percentage of  $\alpha$ SMA<sup>+</sup> cells that are Ki67<sup>+</sup>. (c) Immunostaining for PCNA (red) and SOX9 (green) and DAPI staining (blue) of transverse sections of E14.5 WT (n=7) and *Kcnj13*<sup>T38C/T38C</sup> (n=7) tracheas. (d) Percentage of SOX9<sup>+</sup> cells that are PCNA<sup>+</sup>. (e) Immunostaining for cleaved caspase-3 (Casp3, red) and SOX9 (green) and DAPI staining (blue) of transverse sections of E13.5 WT (n=6) and *Kcnj13*<sup>T38C/T38C</sup> (n=6) tracheas. (f) RT-qPCR analysis of *Sox9* expression in E14.5 WT (n=6) and *Kcnj13*<sup>T38C/T38C</sup> (n=6) tracheas. (g) Immunostaining for acetylated alpha-tubulin (multiciliated cells; green), CC10 (club cells; red) and KRT5 (basal cells; green) and DAPI staining (blue) of transverse sections of P0 WT (n=7) and *Kcnj13*<sup>T38C/T38C</sup> (n=7) tracheas. (h) Quantification of acetylated alpha-tubulin<sup>+</sup> cells in each section of P0 WT (n=7) and *Kcnj13*<sup>T38C/T38C</sup> (n=7) tracheas. (i) Quantification of CC10<sup>+</sup> cells in each section of P0 WT (n=7) and *Kcnj13*<sup>T38C/T38C</sup> (n=7) tracheas. (j) Quantification of KRT5<sup>+</sup> cells in each section of P0 WT (n=7) and *Kcnj13*<sup>T38C/T38C</sup> tracheas (n=7). (k) Immunostaining for CDH1 (epithelial cells; green) and DAPI staining (blue) of transverse sections of E18.5 WT (n=7) and *Kcnj13*<sup>T38C/T38C</sup> (n=7) tracheas. Scale bars: 200  $\mu$ m (g), 50  $\mu$ m (a, c), 20  $\mu$ m (e, k). \*\*\* $P < 0.001$ ; NS, not significant; Unpaired Student's *t*-test, mean  $\pm$  s.d.



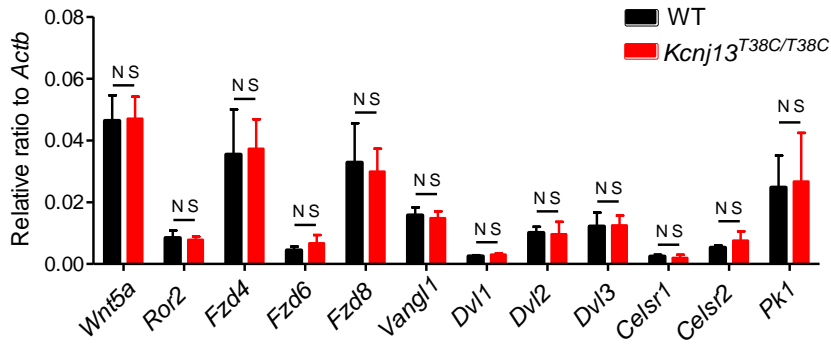

**Supplementary Figure 6. *Kcnj13*<sup>T38C/T38C</sup> tracheas exhibit WT-like expression levels of Wnt/PCP pathway genes.** RT-qPCR analysis of *Wnt5a*, *Ror2*, *Fzd4*, *Fzd6*, *Fzd8*, *Vangl1*, *Dvl1*, *Dvl2*, *Dvl3*, *Celsr1*, *Celsr2* and *Pk1* expression in E14.5 WT (n=5) and *Kcnj13*<sup>T38C/T38C</sup> (n=5) tracheas. NS, not significant; Unpaired Student's *t*-test, mean ± s.d.

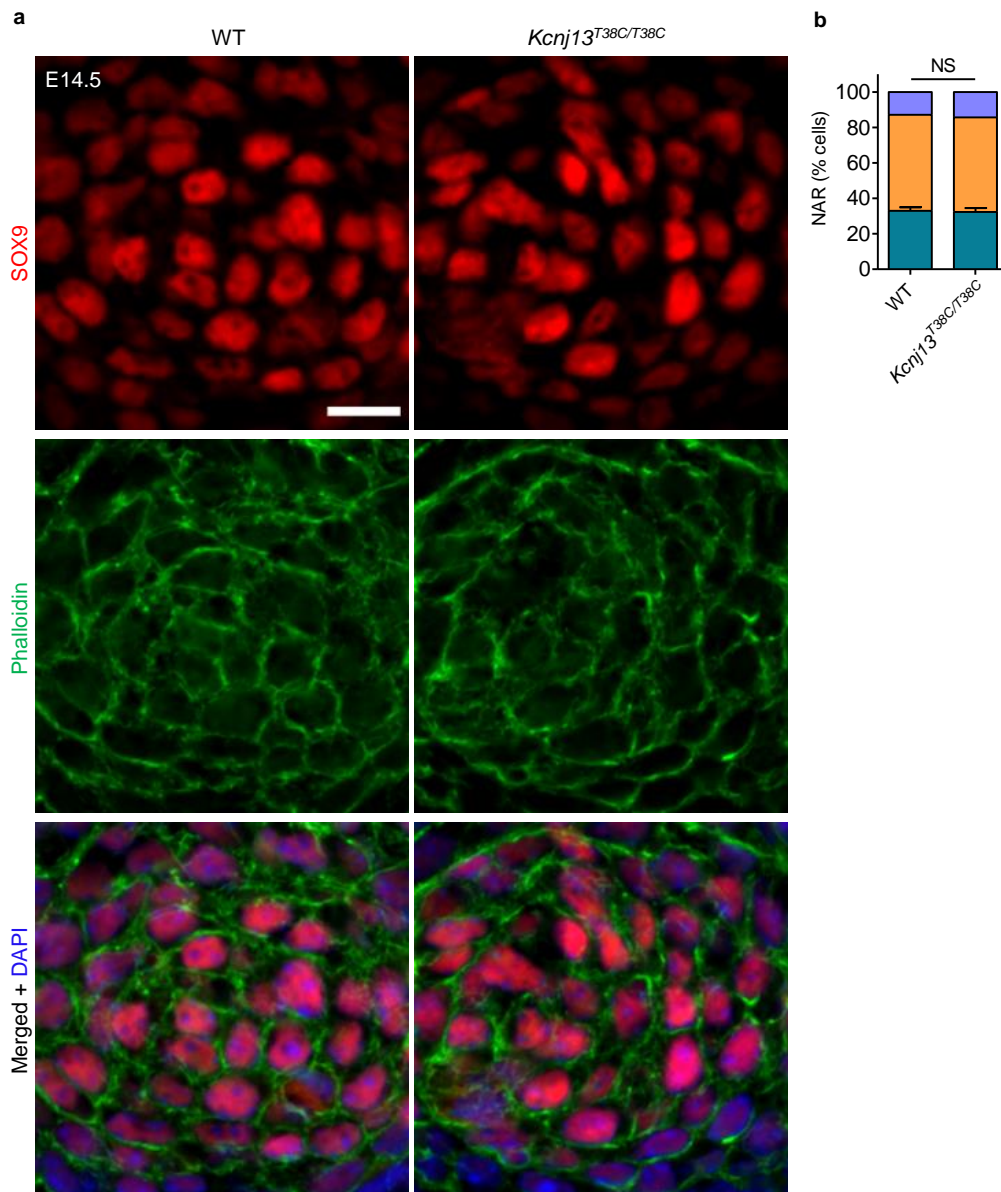

**Supplementary Figure 7. *Kcnj13<sup>T38C/T38C</sup>* tracheas exhibit WT-like SOX9+ mesenchymal cell shape.** (a) Immunostaining for SOX9 (red) and phalloidin (green) and DAPI (blue) staining of transverse sections of E14.5 WT (n=7) and *Kcnj13<sup>T38C/T38C</sup>* (n=7) tracheas. (b) Quantification of cell nuclear aspect ratio (NAR) of E14.5 WT (n=7) and *Kcnj13<sup>T38C/T38C</sup>* (n=7) SOX9+ mesenchymal cells. Scale bar: 10  $\mu$ m (a). NS, not significant; Unpaired Student's *t*-test, mean  $\pm$  s.d.

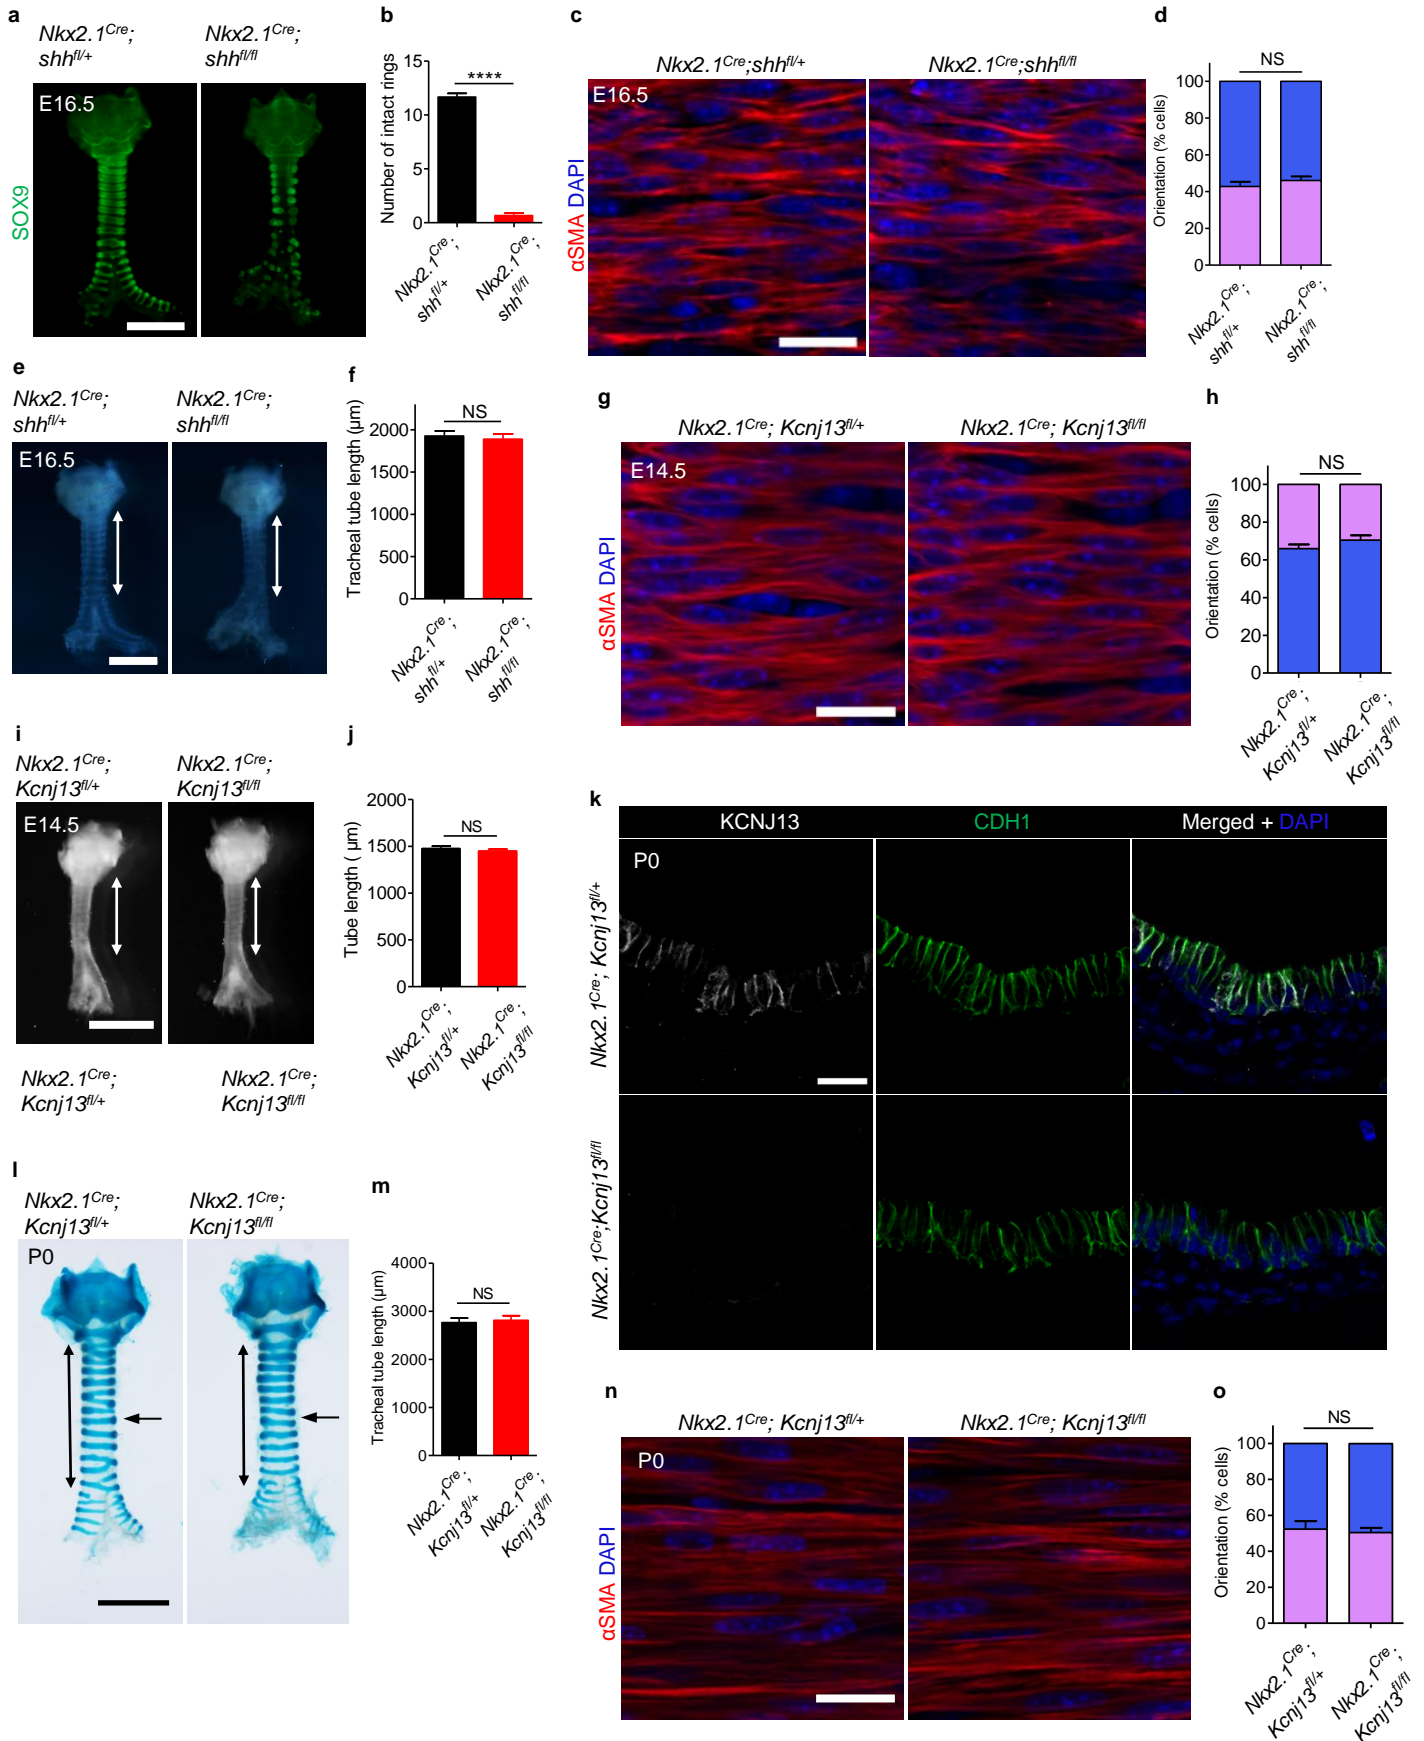

**Supplementary Figure 8. *Nkx2.1<sup>Cre</sup>;shh<sup>fl/fl</sup>* and *Nkx2.1<sup>Cre</sup>;Kcnj13<sup>fl/fl</sup>* mice exhibit WT-like SM cell alignment and tracheal tube elongation.** (a) Immunostaining for SOX9 (green) in ventral views of E16.5 control (n=7) and *Nkx2.1<sup>Cre</sup>;shh<sup>fl/fl</sup>* (n=7) tracheas. (b) Quantification of intact tracheal cartilage rings in

E16.5 control (n=7) and *Nkx2.1<sup>Cre</sup>;shh<sup>flox/flox</sup>* (n=7) tracheas. **(c)** Immunostaining for  $\alpha$ SMA (red) and DAPI staining (blue) in dorsal views of E16.5 control (n=7) and *Nkx2.1<sup>Cre</sup>;shh<sup>flox/flox</sup>* (n=7) tracheas. **(d)** Quantification of E16.5 control (n=7) and *Nkx2.1<sup>Cre</sup>;shh<sup>flox/flox</sup>* (n=7) tracheal SM cell orientation. **(e)** Representative images of E16.5 control (n=7) and *Nkx2.1<sup>Cre</sup>;shh<sup>flox/flox</sup>* (n=7) tracheas. Double-sided arrows indicate tracheal tube length. **(f)** Quantification of E16.5 control (n=7) and *Nkx2.1<sup>Cre</sup>;shh<sup>flox/flox</sup>* (n=7) tracheal tube length. **(g)** Immunostaining for  $\alpha$ SMA (red) and DAPI staining (blue) in dorsal views of E14.5 control (n=6) and *Nkx2.1<sup>Cre</sup>;Kcnj13<sup>flox/flox</sup>* (n=6) tracheas. **(h)** Quantification of E14.5 control (n=6) and *Nkx2.1<sup>Cre</sup>;shh<sup>flox/flox</sup>* (n=6) tracheal SM cell orientation. **(i)** Representative images of E14.5 control (n=6) and *Nkx2.1<sup>Cre</sup>;Kcnj13<sup>flox/flox</sup>* (n=6) tracheas. Double-sided arrows indicate tracheal tube length. **(j)** Quantification of E14.5 control (n=6) and *Nkx2.1<sup>Cre</sup>;Kcnj13<sup>flox/flox</sup>* (n=6) tracheal tube length. **(k)** Immunostaining for KCNJ13 (red) and CDH1 (green) and DAPI staining (blue) of transverse sections of P0 control (n=5) and *Nkx2.1<sup>Cre</sup>;Kcnj13<sup>flox/flox</sup>* (n=5) tracheas. **(l)** Representative images of ventral views of wholemount tracheas stained with alcian blue from P0 control (n=5) and *Nkx2.1<sup>Cre</sup>;Kcnj13<sup>flox/flox</sup>* mice (n=5). Double-sided arrows indicate tracheal tube length. Arrows point to tracheal cartilage rings. **(m)** Quantification of P0 control (n=5) and *Nkx2.1<sup>Cre</sup>;Kcnj13<sup>flox/flox</sup>* (n=5) tracheal tube length. **(n)** Immunostaining for  $\alpha$ SMA (red) and DAPI staining (blue) in dorsal views of P0 control (n=6) and *Nkx2.1<sup>Cre</sup>;Kcnj13<sup>flox/flox</sup>* (n=6) tracheas. **(o)** Quantification of P0 control (n=6) and *Nkx2.1<sup>Cre</sup>;shh<sup>flox/flox</sup>* (n=6) tracheal SM cell orientation. Scale bars: 1000  $\mu$ m (**a, e, i, o**), 20  $\mu$ m (**c, g, k, n**). \*\*\*\* $P < 0.0001$ ; NS, not significant; Unpaired Student's *t*-test, mean  $\pm$  s.d.

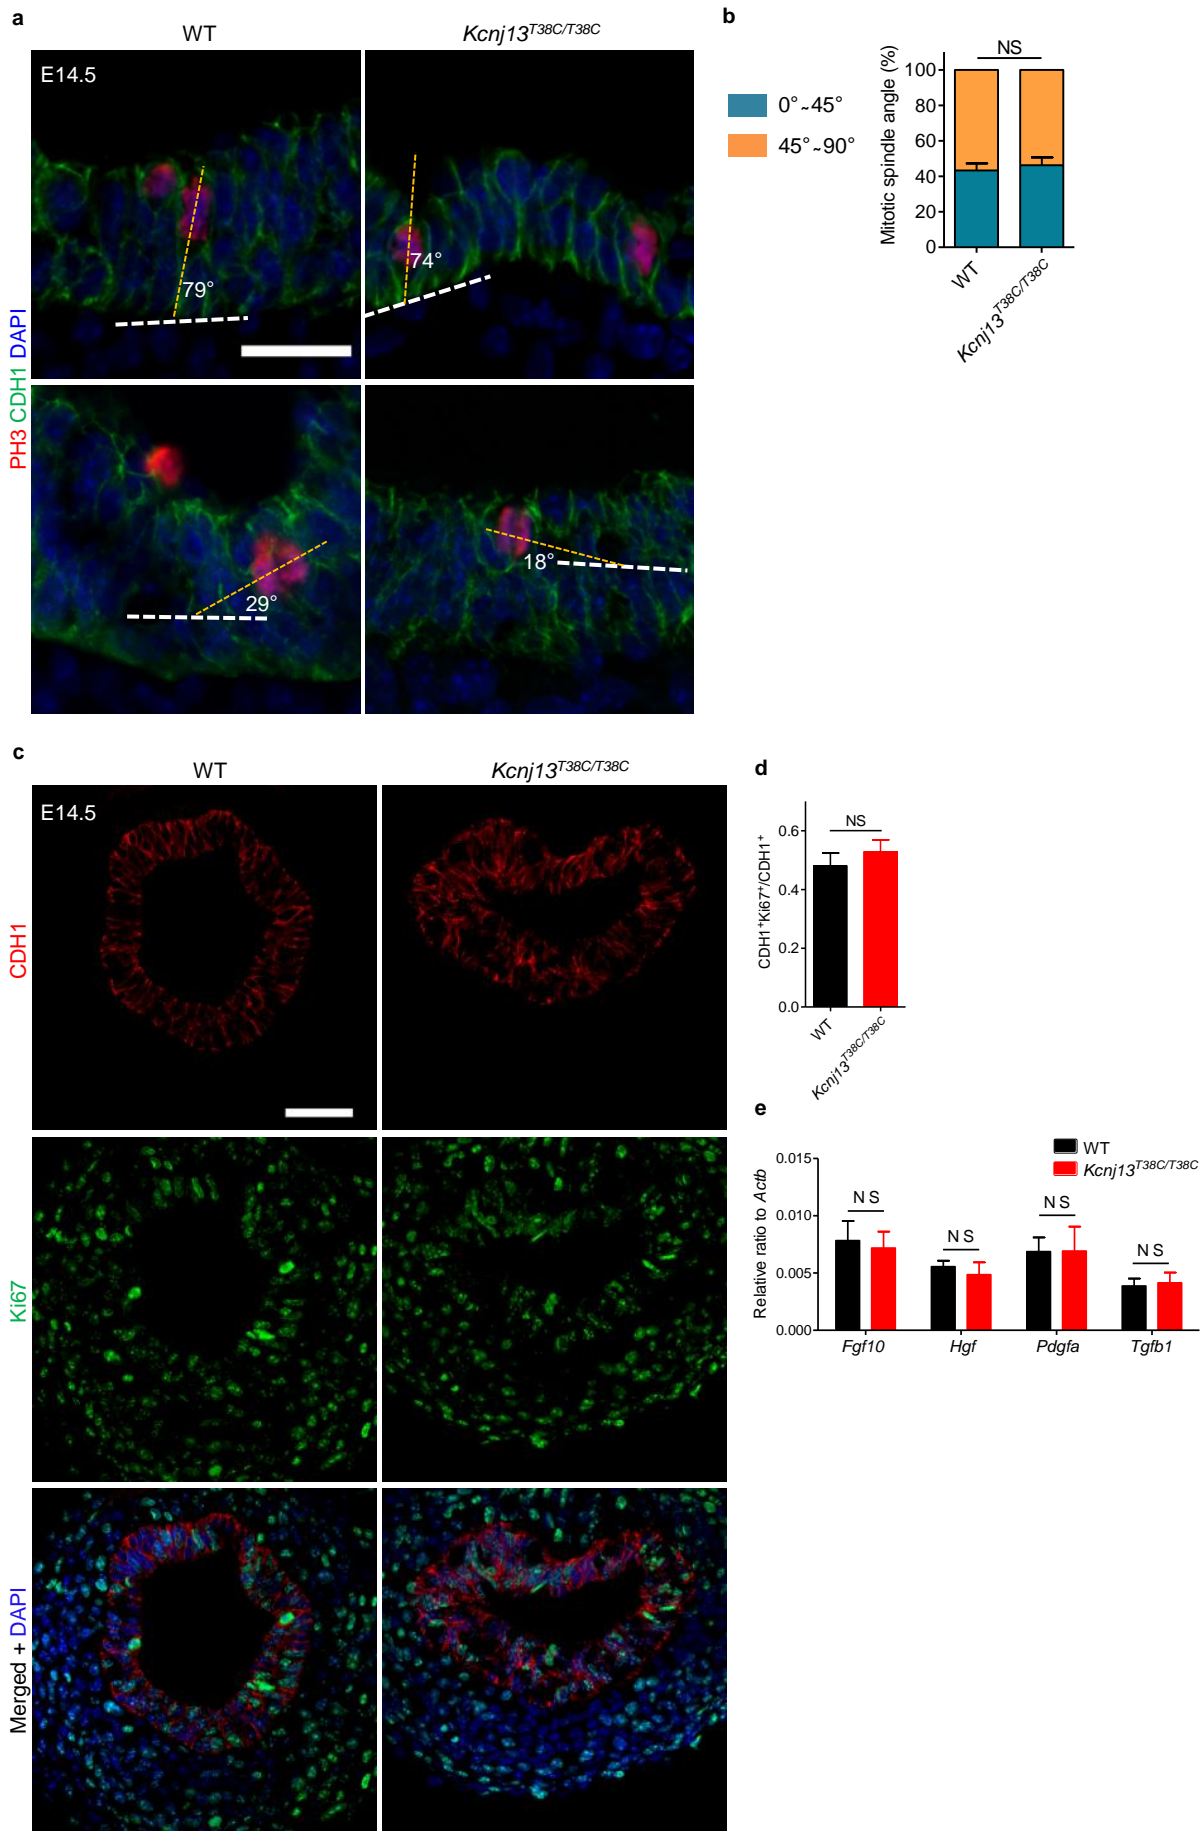

**Supplementary Figure 9. *Kcnj13*<sup>T38C/T38C</sup> mice exhibit WT-like mitotic spindle orientation and proliferation of tracheal epithelial cells.** (a) Immunostaining for PH3 (red) and CDH1 (green) and

DAPI staining (blue) of transverse sections of E14.5 WT (n=7) and *Kcnj13*<sup>T38C/T38C</sup> (n=7) tracheas. **(b)** Quantification of the mitotic spindle angle of E14.5 WT (n=7) and *Kcnj13*<sup>T38C/T38C</sup> (n=7) dividing epithelial cells. 30 cells were analyzed per animal. **(c)** Immunostaining for CDH1 (red) and Ki67 (green) and DAPI staining (blue) of transverse sections of E14.5 WT (n=7) and *Kcnj13*<sup>T38C/T38C</sup> (n=7) tracheas. **(d)** Percentage of CDH1<sup>+</sup> cells which are Ki67<sup>+</sup>. **(e)** RT-qPCR analysis of *Fgf10*, *Hgf*, *Pdgfa* and *Tgfb1* expression in E14.5 WT (n=6) and *Kcnj13*<sup>T38C/T38C</sup> (n=6) tracheas. Scale bars: 50  $\mu$ m **(c)**, 20  $\mu$ m **(a)**. NS, not significant; Unpaired Student's *t*-test, mean  $\pm$  s.d.

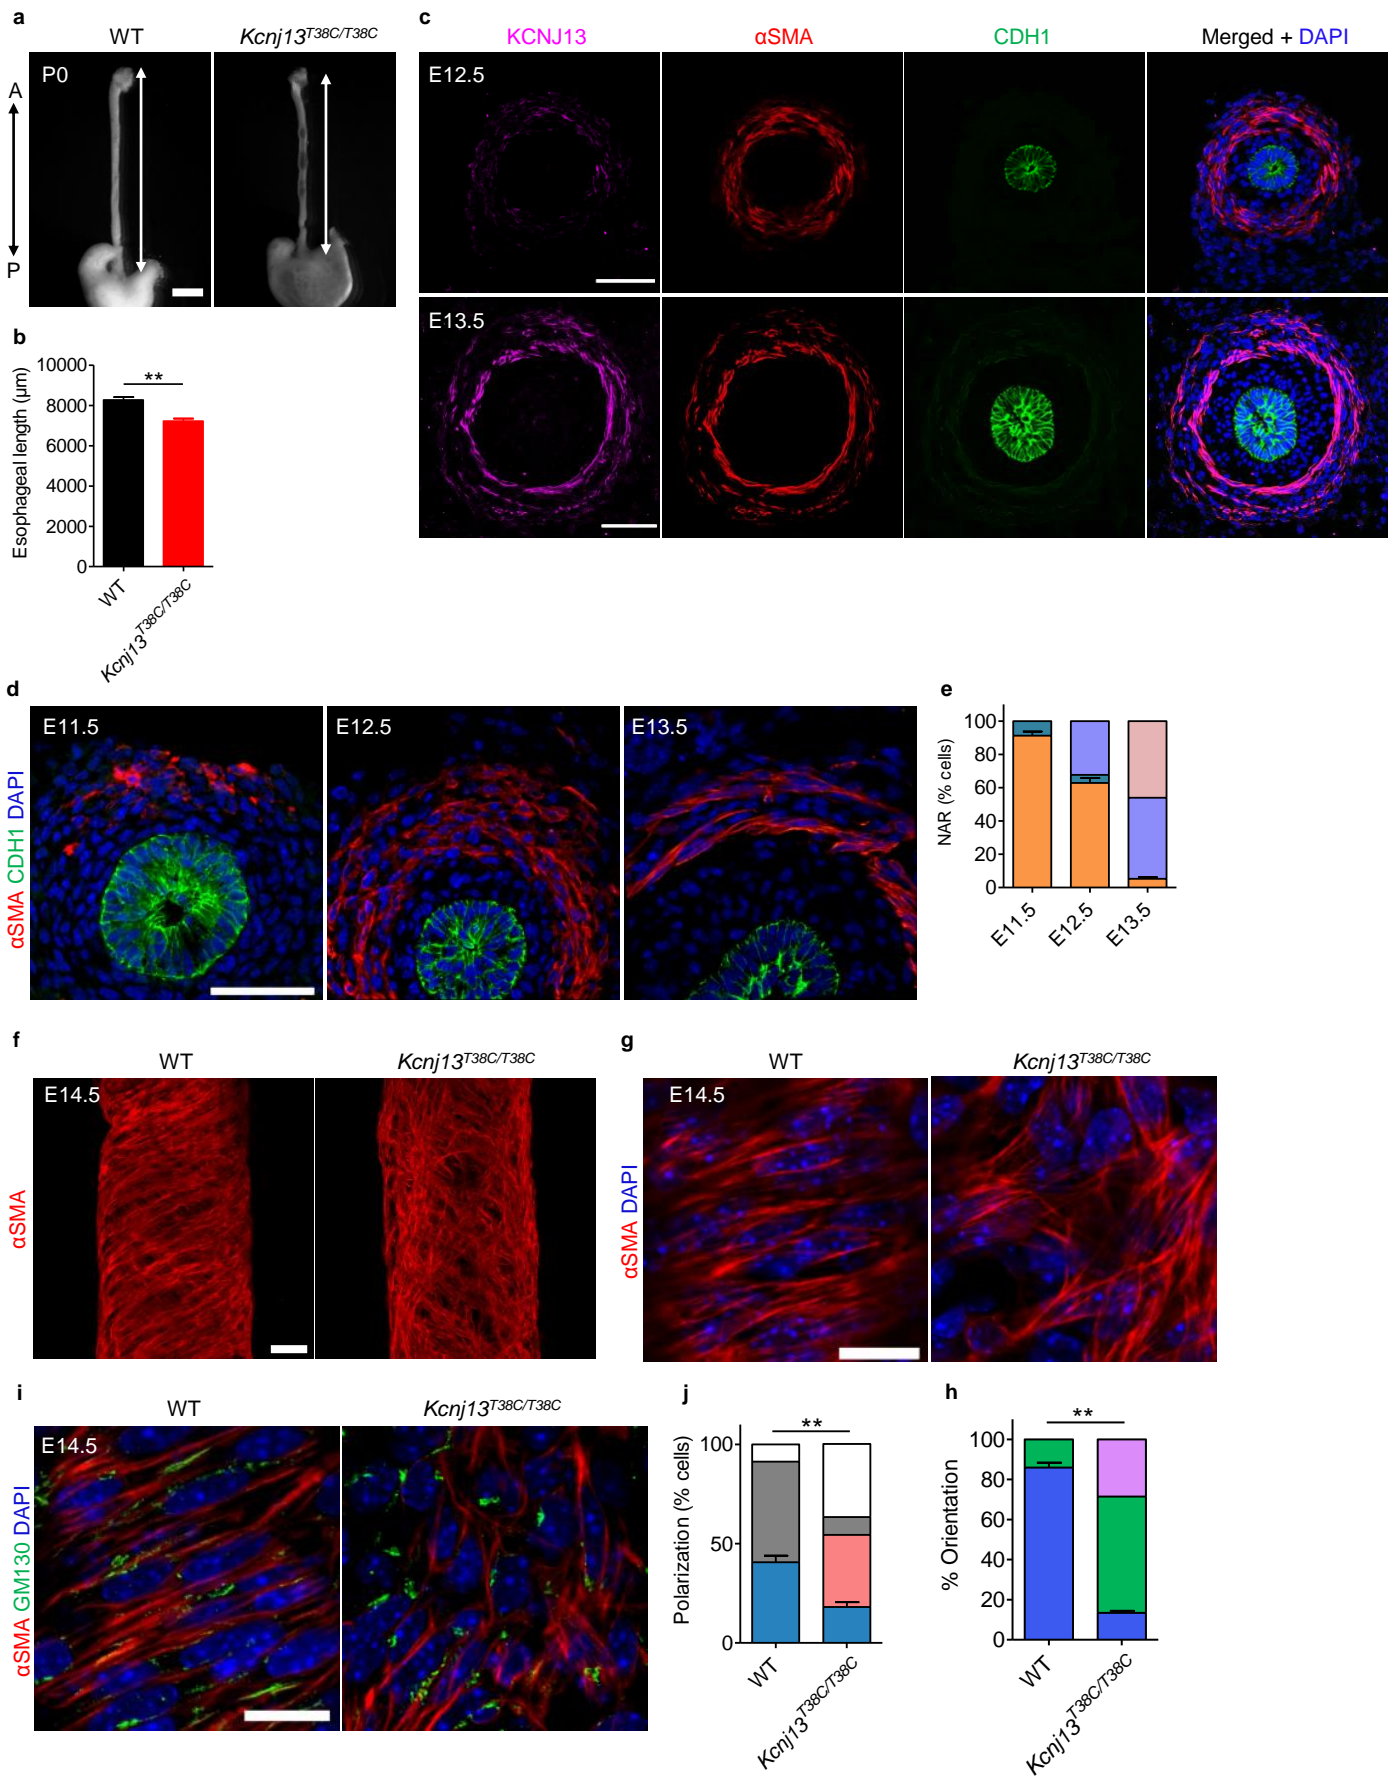

**Supplementary Figure 10. *Kcnj13<sup>T38C/T38C</sup>* mice exhibits esophageal elongation defects with altered SM cell alignment and polarity.** (a) Representative images of P0 WT (n=17) and *Kcnj13<sup>T38C/T38C</sup>*

(n=17) esophagi. Double-sided arrows indicate esophageal length. **(b)** Quantification of P0 WT (n=17) and *Kcnj13<sup>T38C/T38C</sup>* (n=17) esophageal length. **(c)** Immunostaining for KCNJ13 (violet),  $\alpha$ SMA (red) and CDH1 (green) and DAPI staining (blue) of transverse sections of E12.5 (n=5) and E13.5 (n=5) WT esophagi. **(d)** Immunostaining for  $\alpha$ SMA (red) and CDH1 (green) and DAPI staining (blue) of transverse sections of WT esophagi from E11.5 (n=6) to E13.5 (n=5). **(e)** Quantification of WT esophageal SM cell NAR from E11.5 (n=6) to E13.5 (n=5). **(f)** Immunostaining for  $\alpha$ SMA (red) in E14.5 WT (n=8) and *Kcnj13<sup>T38C/T38C</sup>* (n=8) esophagi. **(g)** Immunostaining for  $\alpha$ SMA (red) and DAPI staining (blue) in E14.5 WT (n=8) and *Kcnj13<sup>T38C/T38C</sup>* (n=8) esophagi. **(h)** Quantification of E14.5 WT (n=8) and *Kcnj13<sup>T38C/T38C</sup>* (n=8) esophageal SM cell orientation. **(i)** Immunostaining for  $\alpha$ SMA (red) and GM130 (green) and DAPI staining (blue) in E14.5 WT (n=8) and *Kcnj13<sup>T38C/T38C</sup>* (n=8) esophagi. **(j)** Quantification of E14.5 WT (n=8) and *Kcnj13<sup>T38C/T38C</sup>* (n=8) Golgi-apparatus position relative to the nucleus. Scale bars: 1000  $\mu$ m **(a)**, 50  $\mu$ m **(c, d, f)**, 20  $\mu$ m **(g, i)**. \*\* $P < 0.01$ ; Unpaired Student's *t*-test, mean  $\pm$  s.d. A, Anterior; P, Posterior.



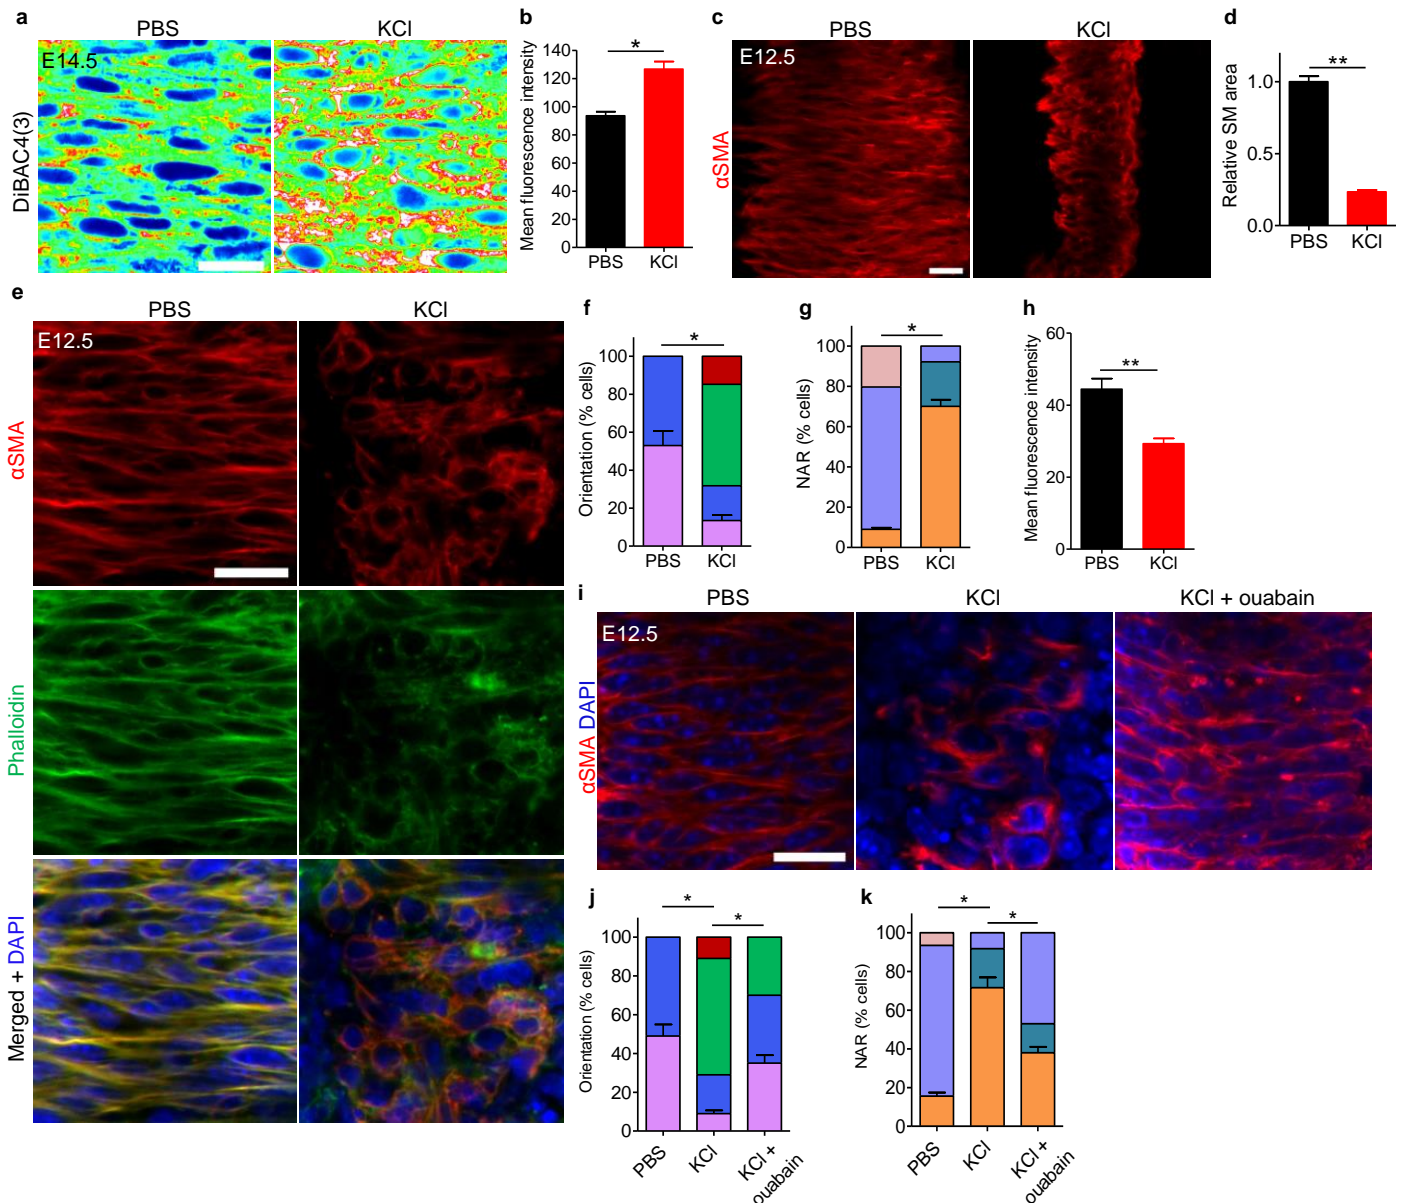

**Supplementary Figure 11. Elevated extracellular potassium concentration in tracheas leads to SM cell phenotypes similar to those observed in *Kcnj13*<sup>T38C/T38C</sup> mice.**

(a) DiBAC4(3) fluorescence in dorsal views of E14.5 tracheal SM cells after PBS (n=9) or 40 mM KCl (n=9) treatment. (b) Quantification of mean DiBAC4(3) fluorescence intensity in E14.5 tracheal SM cells after PBS (n=9) or 40 mM KCl (n=9) treatment. (c) Immunostaining for  $\alpha$ SMA (red) in dorsal views of E12.5 tracheas after a 48 hour PBS (n=9) or 40 mM KCl (n=9) treatment. (d) Quantification of SM area in E12.5 tracheas after a 48 hour PBS (n=9) or 40 mM KCl (n=9) treatment. (e) Immunostaining for  $\alpha$ SMA (red) and phalloidin (green) and DAPI (blue) staining in dorsal views of E12.5 tracheas after a 48 hour PBS (n=9) or 40 mM KCl (n=9) treatment. (f) Quantification of E12.5 tracheal SM cell orientation after a 48 hour PBS (n=9) or 40 mM KCl (n=9) treatment. (g) Quantification of E12.5 tracheal SM cell NAR after a 48 hour PBS (n=9) or 40 mM KCl (n=9) treatment. (h) Quantification of mean phalloidin fluorescence intensity in E12.5 tracheal SM cells after a 48 hour PBS (n=9) or 40 mM KCl (n=9) treatment. (i) Immunostaining for  $\alpha$ SMA (red) and DAPI staining (blue) in dorsal views of E12.5 WT tracheas after a 48 hour PBS (n=24), 40 mM KCl (n=12) or 40 mM KCl plus 200  $\mu$ M ouabain (pre-incubated for 30 min) (n=12) treatment. (j) Quantification of SM cell orientation of E12.5 WT tracheas after a 48 hour PBS (n=12), 40 mM KCl (n=12) or 40 mM KCl plus 200  $\mu$ M ouabain (pre-incubated for 30 min) (n=12) treatment. (k) Quantification of SM cell NAR of E12.5 WT tracheas after a 48 hour PBS (n=12), 40 mM KCl (n=12) or 40 mM KCl plus 200  $\mu$ M ouabain (pre-incubated for 30 min) (n=12) treatment. Scale bars: 20  $\mu$ m (a, c, e, i). \* $P$  < 0.05; \*\* $P$  < 0.01; Unpaired Student's  $t$ -test, mean  $\pm$  s.d.

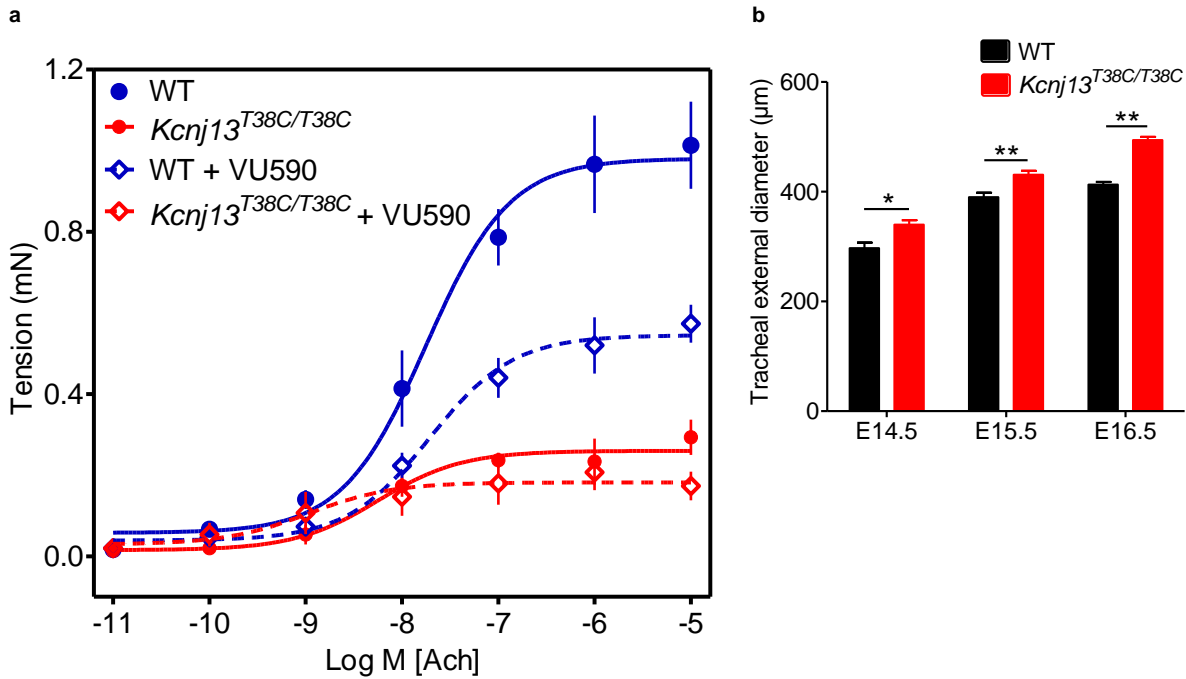

**Supplementary Figure 12. *Kcnj13*<sup>T38C/T38C</sup> mice exhibit compromised tracheal contraction and expanded tube diameter.** (a) Tracheal contractile force measurements of P0 WT (n=12), *Kcnj13*<sup>T38C/T38C</sup> (n=12), as well as WT (n=12) and *Kcnj13*<sup>T38C/T38C</sup> (n=12) after a 10 min 50 μM VU590 treatment. (b) Quantification of WT (n=8) and *Kcnj13*<sup>T38C/T38C</sup> (n=8) external diameter of the anterior trachea at several embryonic stages. \**P* < 0.05; \*\**P* < 0.01; Unpaired Student's *t*-test, mean ± s.d.

Uncropped images related to Fig. 6c

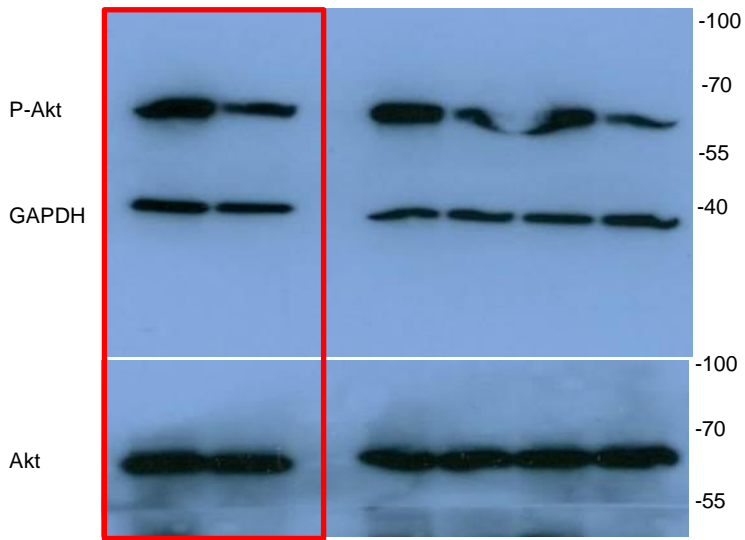

Uncropped images related to Fig. 6e

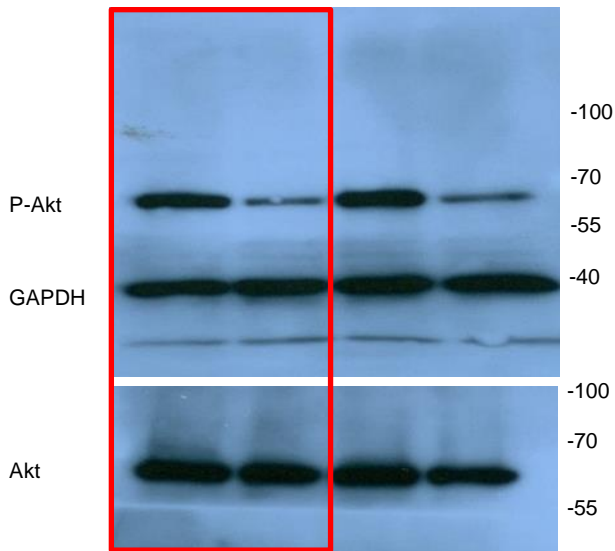

**Supplementary Figure 13. Uncropped images related to western blotting data.**

## Supplementary Tables

| Sample Name | Assay Name    | Ct mean |
|-------------|---------------|---------|
| E11.5       | <i>Kcnj13</i> | 31.79   |
| E11.5       | <i>Actb</i>   | 24.52   |
| E12.5       | <i>Kcnj13</i> | 31.71   |
| E12.5       | <i>Actb</i>   | 24.46   |
| E13.5       | <i>Kcnj13</i> | 32.29   |
| E13.5       | <i>Actb</i>   | 25.03   |

### Supplementary Table 1. RNA expression levels were analyzed by RT-qPCR; Ct values listed for Supplementary Fig. 4a.

| Sample Name                              | Assay Name  | Ct mean |
|------------------------------------------|-------------|---------|
| E14.5 WT                                 | <i>Sox9</i> | 26.31   |
| E14.5 <i>Kcnj13</i> <sup>T38C/T38C</sup> | <i>Sox9</i> | 26.70   |
| E14.5 WT                                 | <i>Actb</i> | 21.60   |
| E14.5 <i>Kcnj13</i> <sup>T38C/T38C</sup> | <i>Actb</i> | 21.89   |

### Supplementary Table 2. RNA expression levels were analyzed by RT-qPCR; Ct values listed for Supplementary Fig. 5f.

| Sample Name                              | Assay Name   | Ct mean |
|------------------------------------------|--------------|---------|
| E14.5 WT                                 | <i>Fgf10</i> | 30.75   |
| E14.5 <i>Kcnj13</i> <sup>T38C/T38C</sup> | <i>Fgf10</i> | 30.93   |
| E14.5 WT                                 | <i>Hgf</i>   | 31.22   |
| E14.5 <i>Kcnj13</i> <sup>T38C/T38C</sup> | <i>Hgf</i>   | 31.51   |
| E14.5 WT                                 | <i>Pdgfa</i> | 30.93   |
| E14.5 <i>Kcnj13</i> <sup>T38C/T38C</sup> | <i>Pdgfa</i> | 31.02   |
| E14.5 WT                                 | <i>Tgfb1</i> | 30.56   |
| E14.5 <i>Kcnj13</i> <sup>T38C/T38C</sup> | <i>Tgfb1</i> | 30.60   |
| E14.5 WT                                 | <i>Actb</i>  | 23.72   |
| E14.5 <i>Kcnj13</i> <sup>T38C/T38C</sup> | <i>Actb</i>  | 23.78   |

### Supplementary Table 4. RNA expression levels were analyzed by RT-qPCR; Ct values listed for Supplementary Fig. 9e.

| Sample Name                              | Assay Name    | Ct mean |
|------------------------------------------|---------------|---------|
| E14.5 WT                                 | <i>Wnt5a</i>  | 27.67   |
| E14.5 <i>Kcnj13</i> <sup>T38C/T38C</sup> | <i>Wnt5a</i>  | 28.19   |
| E14.5 WT                                 | <i>Ror2</i>   | 29.92   |
| E14.5 <i>Kcnj13</i> <sup>T38C/T38C</sup> | <i>Ror2</i>   | 30.70   |
| E14.5 WT                                 | <i>Fzd4</i>   | 28.20   |
| E14.5 <i>Kcnj13</i> <sup>T38C/T38C</sup> | <i>Fzd4</i>   | 28.57   |
| E14.5 WT                                 | <i>Fzd6</i>   | 31.08   |
| E14.5 <i>Kcnj13</i> <sup>T38C/T38C</sup> | <i>Fzd6</i>   | 31.13   |
| E14.5 WT                                 | <i>Fzd8</i>   | 28.29   |
| E14.5 <i>Kcnj13</i> <sup>T38C/T38C</sup> | <i>Fzd8</i>   | 28.88   |
| E14.5 WT                                 | <i>Vangl1</i> | 29.22   |
| E14.5 <i>Kcnj13</i> <sup>T38C/T38C</sup> | <i>Vangl1</i> | 29.86   |
| E14.5 WT                                 | <i>Dvl1</i>   | 31.88   |
| E14.5 <i>Kcnj13</i> <sup>T38C/T38C</sup> | <i>Dvl1</i>   | 32.14   |
| E14.5 WT                                 | <i>Dvl2</i>   | 29.86   |
| E14.5 <i>Kcnj13</i> <sup>T38C/T38C</sup> | <i>Dvl2</i>   | 30.59   |
| E14.5 WT                                 | <i>Dvl3</i>   | 29.67   |
| E14.5 <i>Kcnj13</i> <sup>T38C/T38C</sup> | <i>Dvl3</i>   | 30.14   |
| E14.5 WT                                 | <i>Celsr1</i> | 31.99   |
| E14.5 <i>Kcnj13</i> <sup>T38C/T38C</sup> | <i>Celsr1</i> | 32.44   |
| E14.5 WT                                 | <i>Celsr2</i> | 30.77   |
| E14.5 <i>Kcnj13</i> <sup>T38C/T38C</sup> | <i>Celsr2</i> | 30.90   |
| E14.5 WT                                 | <i>Pk1</i>    | 28.66   |
| E14.5 <i>Kcnj13</i> <sup>T38C/T38C</sup> | <i>Pk1</i>    | 29.22   |
| E14.5 WT                                 | <i>Actb</i>   | 23.21   |
| E14.5 <i>Kcnj13</i> <sup>T38C/T38C</sup> | <i>Actb</i>   | 23.77   |

### Supplementary Table 3. RNA expression levels were analyzed by RT-qPCR; Ct values listed for Supplementary Fig. 6.
